# Supplementary material
Source: PubMed Central journal article supplement (PMC2593668)
Supplement: pp.108.130419_1.pdf [file pp.108.130419_1.pdf]

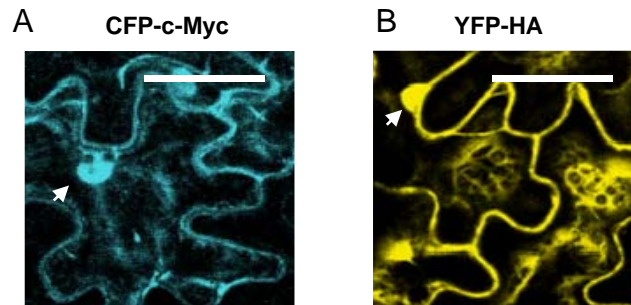

**Supplemental Figure S1.** Subcellular localization patterns of the control fluorescent proteins. A, CFP-c-Myc. B, YFP-HA. Confocal laser scanning images were obtained from the tobacco epidermal cells transiently expressing each of the control proteins. Arrow heads indicate the nuclei. Scale bars, 50  $\mu$ m.
