# Supplementary material
Source: PubMed Central journal article supplement (PMC2593668)
Supplement: pp.108.130419_2.pdf [file pp.108.130419_2.pdf]

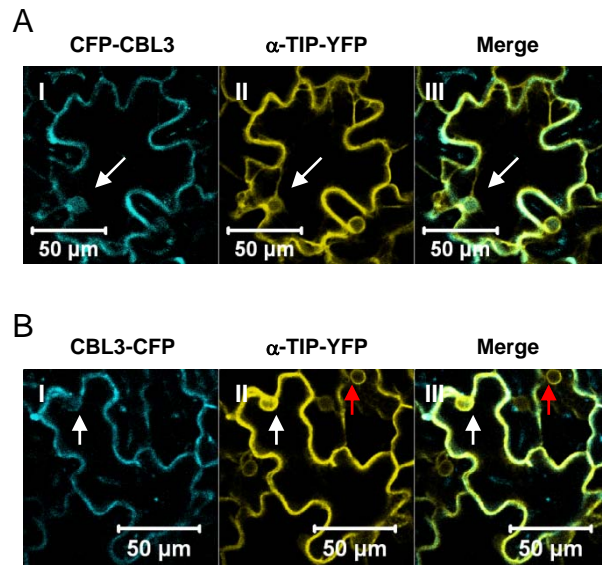

**Supplemental Figure S2.** Confirmation of the CBL3 localization pattern using either the N- or C-terminal tagged CFP constructs. A, Co-localization of CFP-CBL3 and  $\alpha$ -TIP-YFP. B, Co-localization of CBL3-CFP and  $\alpha$ -TIP-YFP. Confocal laser scanning images of the tobacco epidermal cells transiently expressing the two fusion proteins display subcellular localization of the CFP-tagged CBL3 (I) and YFP-tagged marker (II) proteins. The two fluorescence images are merged (III). Scale bars, 50  $\mu$ m. White and red arrows indicate vacuolar membraneous invagination surrounding the nucleus and the tonoplast, respectively.
